# Supplementary material for: Estimating stillbirth and neonatal mortality rate among Rohingya refugees in Bangladesh, September 2017 to December 2018: a prospective surveillance
Source: HighWire-hosted journal article supplement (doi:10.1136/bmjgh-2021-008110), 2022-04-01
Supplement: bmjgh-2021-008110supp001_data_supplement.pdf [file bmjgh-2021-008110supp001_data_supplement.pdf]

## Supplementary File

| <b>Table S1: Health facility level and description for Rohingya refugee response in Bangladesh (supplemental table 1) (adapted from the Health Sector health facility data May 24, 2018 data dictionary) [4]</b>               |                                                                                                                |
|--------------------------------------------------------------------------------------------------------------------------------------------------------------------------------------------------------------------------------|----------------------------------------------------------------------------------------------------------------|
| <b>Type of facility</b>                                                                                                                                                                                                        | <b>Definition</b>                                                                                              |
| Health Post (Fixed) <sup>§</sup>                                                                                                                                                                                               | Basic daytime outpatient services from a fixed site                                                            |
| Health Post (Mobile) <sup>§</sup>                                                                                                                                                                                              | Basic daytime outpatient services that move between sites (has a doctor on site)                               |
| Primary Health Center                                                                                                                                                                                                          | Primary health services with in-patient capacity                                                               |
| Labor Room or Sexual and Reproductive Health Unit                                                                                                                                                                              | Provides specialized sexual and reproductive health services or normal deliveries only                         |
| Secondary Health Facility                                                                                                                                                                                                      | Includes hospital, minus specialized care such as cardiology, etc.                                             |
| Diarrheal Treatment Center <sup>‡</sup>                                                                                                                                                                                        | Specialized facility for isolation and diarrhea management                                                     |
| Diphtheria Treatment Center <sup>‡</sup>                                                                                                                                                                                       | Specialized facility for isolation and Diphtheria management                                                   |
| Satellite Clinic <sup>β</sup>                                                                                                                                                                                                  | Temporary structure linked to a static facility. Registered doctor visits several satellite clinics in one day |
| Community Clinic (Ministry of Health (MoH)) <sup>‡</sup>                                                                                                                                                                       | Fixed Government facility, staffed by health assistants                                                        |
| Other <sup>β</sup>                                                                                                                                                                                                             | Places that provide specialized services but do not fit into above choices                                     |
| <i>§Health post - for the purpose of analysis, we combined fixed and mobile health posts.</i>                                                                                                                                  |                                                                                                                |
| <i>‡Specialized care – for the purpose of this analysis, we combined community clinics, diarrhea, diphtheria treatment center, satellite clinic, and others under one category. MOH, Ministry of Health and Family Welfare</i> |                                                                                                                |

**Figure S1. Correlation between the number of health facilities and population size of camp in 29 Rohingya refugee camps in Cox's Bazar District, Bangladesh, September 2017 to December 2018.** The red line represents a local regression (Lowess) smooth of the relationship of number of health facilities in the camp to population estimates of the camps. Gray area is the 95% confidence interval. The green circles represent each camp's population estimate. The correlation coefficient (Spearman's rho) was 0.564, p-value=0.002.

**Figure S2. Boxplot comparing the mean neonatal mortality rate between camps that were closer to a labor room/sexual and reproductive health unit (yellow) with camps that were nearer a secondary health facility (blue) in 29 Rohingya refugee camps in Cox's Bazar District, Bangladesh, September 2017 to December 2018.** Black dots represent estimated neonatal mortality rate of the camps.

**Figure S3. Boxplot comparing the mean stillbirth rate between camps that were closer to a labor room/sexual and reproductive health unit (yellow) with camps that were nearer a secondary health facility (blue) in 29 Rohingya refugee camps in Cox's Bazar District, Bangladesh, September 2017 and December 2018.** Black dots represent estimated stillbirth rates of the camps.
