# Supplementary figures and images for: Estimating stillbirth and neonatal mortality rate among Rohingya refugees in Bangladesh, September 2017 to December 2018: a prospective surveillance
Source: HighWire-hosted journal article supplement (doi:10.1136/bmjgh-2021-008110), 2022-04-01

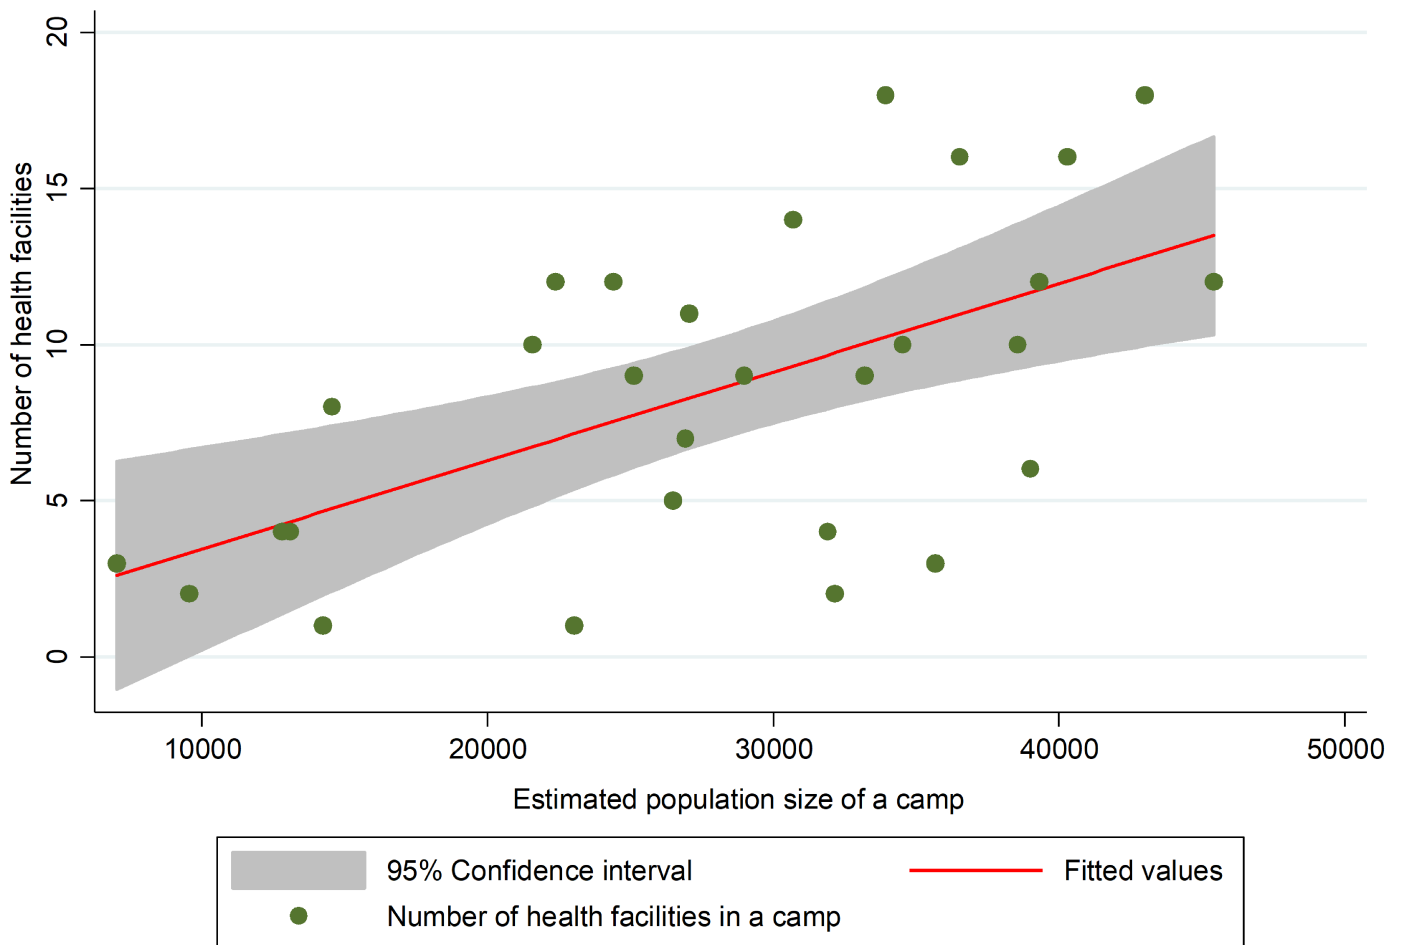

Supplement: bmjgh-2021-008110supp002_data_supplement.pdf [file bmjgh-2021-008110supp002_data_supplement.pdf]

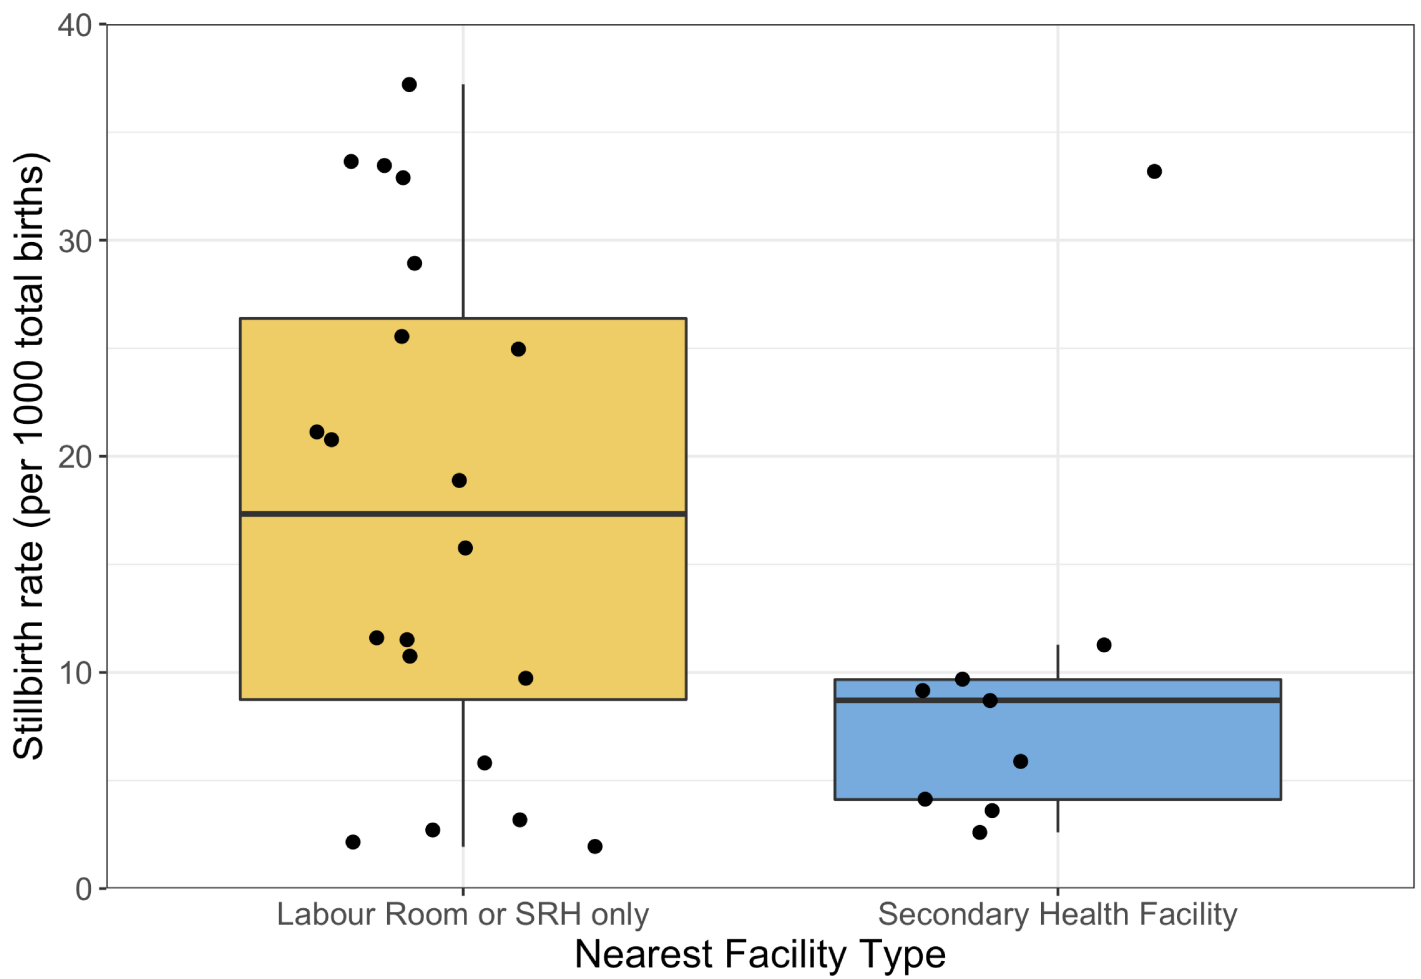

Supplement: bmjgh-2021-008110supp004_data_supplement.pdf [file bmjgh-2021-008110supp004_data_supplement.pdf]
